1           **The real-world effectiveness of an intranasal spray A8G6**  
2                   **antibody cocktail in the post-exposure prophylaxis of**  
3                                   **COVID-19**

4  
5 Xiaosong Li<sup>1\*</sup>, Pai Peng<sup>2,3\*</sup>, Haijun Deng<sup>2,3\*</sup>, Qian Yang<sup>1</sup>, Shi Chen<sup>1</sup>, Benhua  
6 Li<sup>1</sup>, Miao He<sup>4</sup>, Zhu Yang<sup>5</sup>, Ni Tang<sup>2,3#</sup>, Ailong Huang<sup>2,3#</sup>

7  
8           **Author Affiliations:**

9           <sup>1</sup>Clinical Molecular Medicine Testing Center, The First Affiliated Hospital of  
10 Chongqing Medical University, Chongqing 400016, China.

11           <sup>2</sup>Key Laboratory of Molecular Biology for Infectious Diseases (Ministry of  
12 Education), Department of Infectious Diseases, Chongqing Medical University,  
13 Chongqing, China.

14           <sup>3</sup>Institute for Viral Hepatitis, the Second Affiliated Hospital of Chongqing  
15 Medical University, Chongqing, China.

16           <sup>4</sup>Laboratory Animal Center of Chongqing Medical University, Chongqing,  
17 China

18           <sup>5</sup>Department of Gynecology and Obstetrics, the Second Affiliated Hospital of  
19 Chongqing Medical University

20

21           \* These authors contributed equally to this work.

22           # **Correspondence:** Ai-long Huang (ahuang@cqmu.edu.cn) and Ni Tang  
23 (nitang@cqmu.edu.cn)

24

25           Key Laboratory of Molecular Biology for Infectious Diseases (Ministry of  
26 Education), Institute for Viral Hepatitis, Department of Infectious Diseases, the  
27 Second Affiliated Hospital, Chongqing Medical University, Chongqing, China.

28           Yixue Yuan Road No.1, Chongqing, 400016, P. R. China.

29 Tel/Fax: 86-23-68486780

30 **Summary**

31 **Background** Due to the continuous appearance of novel SARS-CoV-2  
32 variants that are resistant to approved antibodies and leading to the epidemic  
33 rebound, several approved neutralizing antibodies have been paused for their  
34 usage against COVID-19. Previously, we identified A8G6, an antibody  
35 combination of two synergic SARS-CoV-2 neutralizing antibodies 55A8 and  
36 58G6, that showed broad neutralizing activities against Omicron variants.  
37 When administrated by the nasal spray delivery system, A8G6 showed  
38 promising efficacy in COVID-19 animal models and also showed favorable  
39 safety profile in preclinical models as well as in a first-in-human trial. The aim  
40 of this study is to evaluate the real-world efficacy of A8G6 neutralizing antibody  
41 nasal spray in post-exposure prevention of COVID-19.

42

43 **Methods** From November 27, 2022 to January 31, 2023, an open-label,  
44 non-randomized, two-arm, blank-controlled, investigator-initiated trial was  
45 conducted in Chongqing, China. High-risk healthy participants (18-65 years)  
46 within 72 hours after close contact to SARS-CoV-2 infected individuals were  
47 recruited and received a three-dose (1.4 mg/dose) A8G6 nasal spray  
48 treatment daily or no treatment (blank control) for 7 consecutive days. The  
49 primary end points were 1) the occurrence of positive SARS-CoV-2 RT-PCR  
50 cases in A8G6 treated group vs blank control group at the end of day 7; 2) time  
51 to SARS-CoV-2 positive conversion at the end of day 7. The secondary end

52 points were 1) viral load of SARS-CoV-2 when participants became  
53 SARS-CoV-2 positive; 2) the time from SARS-CoV-2 infection to negative  
54 COVID-19 conversion. Safety end point of the nasal spray AG86 was analyzed  
55 by recording adverse events during the whole course of this trial. This study  
56 was registered with Chictr.org (ChiCTR2200066416).

57

58 **Findings** Of 513 enrolled participants, 173 in the A8G6 treatment group and  
59 340 in the blank-control group were included in the analysis. SARS-CoV-2  
60 infection occurred in 151/340 (44.4%) subjects in the blank control group and  
61 12/173 (6.9%) subjects with the A8G6 treatment group. The result indicates  
62 that the intranasal spray A8G6 reduces the risk of SARS-CoV-2 infection  
63 (HR=0.12, 95% CI, 0.07-0.22;  $p<0.001$ ). The prevention efficacy of the A8G6  
64 treatment within 72-hours exposure was calculated to be 84.4% (95% CI:  
65 74.4%-90.4%). Moreover, compared to the blank-control group, the time from  
66 the SARS-CoV-2 negative to the positive COVID-19 conversion was  
67 significantly longer in the AG86 treatment group (mean time: 3.4 days in the  
68 A8G6 treatment group vs 2.6 days in the control group,  $p=0.019$ ). In the  
69 secondary end-point analysis, the A8G6 nasal treatment had no effects on the  
70 viral load at baseline SARS-CoV-2 RT-PCR positivity and the time of the  
71 negative COVID-19 conversion (viral clearance). Finally, 5 participants (3.1%)  
72 in the treatment group reported general adverse effects. We did not observe  
73 any severe adverse effects related to the A8G6 treatment in this study.

74

75 **Interpretation** In this study, the intranasal spray AG86 antibody cocktail

76 showed potent efficacy for prevention of SARS-CoV-2 infection in close

77 contacts of COVID-19 patients.

78

79 **Funding** Chongqing Biomedical R&D Major Special Project, Project (No.

80 CSTB2022TIAD-STX0013), Chongqing Science and Health Joint Medical

81 High-end Talent Project (No. 2022GDRC012), Science and Technology

82 Research Program of Chongqing Municipal Education Commission (No.

83 KJZD-K202100402), CQMU Program for Youth Innovation in Future Medicine

84 (No. W0073).

85 **Research in context**

86 *Evidence before the study*

87 Two potent neutralizing antibodies 55A8 and 58G6 against SARS-CoV-2 were  
88 identified from the plasma of COVID-19 convalescent patients. In our previous  
89 studies, the synergetic neutralization of the antibody combination of 55A8 and  
90 58G6 (A8G6) had been shown in structural mechanism, as well as in vitro and  
91 in vivo. Pre-clinical evaluation of A8G6 nasal spray showed promising efficacy  
92 against Omicron BA.4/5 infection in golden syrian hamsters challenged with  
93 live virus. In a first-in-human trial, A8G6 also showed favorable safety profile  
94 and nasal concentration over IC90 of neutralization activity against Omicron  
95 BA.4/5. The preliminary data showed that the intranasal spray A8G6 had the  
96 excellent efficacy, safety and druggability to protect against COVID-19.

97

98 *Added value of this study*

99 This is the first human trial showing that a nasal spray of neutralizing antibody  
100 cocktail is efficacious in preventing SARS-CoV-2 infection but is not efficacious  
101 in the post-infection treatment of COVID-19. In the Omicron wave of the  
102 COVID-19 pandemic in China in November, 2022, COVID-19 close contacts  
103 receiving the A8G6 treatment in the designated quarantine hotels showed a  
104 significantly lower incidence of SARS-CoV-2 infection. Additionally, the A8G6  
105 treatment delayed time from exposure to the diagnosis of the COVID-19  
106 positivity (median time: 3.4 days in the treatment group vs 2.6 days in the

107 control group). Furthermore, we analyzed the effects of the A8G6 treatment on  
108 the clinical status of close contacts who became infected with SARS-CoV-2.  
109 Results suggests that there were no significant differences in viral load of  
110 SARS-CoV-2 at the beginning of positive infection and the time of the viral  
111 clearance between A8G6 treatment and blank control groups. Overall, the trial  
112 result is consistent with the mechanism of action of nasal spray antibody  
113 cocktail for the prevention of SARS-CoV-2 infection. Finally, low safety risk of  
114 the nasal spray A8G6 was also shown in the trial.

115

#### 116 *Implications of all the available evidence*

117 We observed the use of A8G6 to reduce the risk of SARS-CoV-2 infection.  
118 This study provided supporting evidences for the real-world effectiveness and  
119 safety of the nasal spray A8G6 among high-risk close contacts in the  
120 post-exposure prevention of COVID-19 during the Omicron BA.5.2 wave in  
121 China. This is the first proof of concept of using nasal spray neutralizing  
122 antibody for the prevention of viral infection. It implicates that the promising  
123 efficacy of the nasal spray A8G6 makes it possible for the fast-acting  
124 prevention in future COVID-19 waves.

125 **1. Introduction**

126 At present, SARS-CoV-2 is still defined as a Public Health Emergency of  
127 International Concern. Due to the continuous evolution of SARS-CoV-2, its  
128 variants led to a high risk of COVID-19 global transmission. Although  
129 vaccination played important roles in the preventing and controlling of  
130 COVID-19,<sup>1,2</sup> the neutralizing antibodies (NAbs) elicited by vaccines were  
131 heterogeneous among different individuals and were waning within several  
132 months.<sup>3-5</sup> NAbs blocking the entry of SARS-CoV-2 into host cells have been  
133 developed for the COVID-19 prevention or therapy. Several SARS-CoV-2  
134 targeting monoclonal antibodies (mAbs) have previously been authorized for  
135 use through an emergency use authorization (EUA).<sup>6-10</sup> However, due to the  
136 failure or significant decrease of neutralization against some emerging  
137 SARS-CoV-2 variants, the usage of these antibody drugs was limited. There is  
138 an urgent need to develop broad-spectrum and effective NAbs against the  
139 circulating and other novel SARS-CoV-2 variants. Furthermore, those  
140 approved neutralizing antibodies, when administrated systematically, provided  
141 limited efficacy in the prevention of viral infection. We hypothesized that this  
142 was due to the low concentration of those neutralizing antibodies at nasal  
143 compartment when administered systematically. As a potentially more effective  
144 prophylactic approach, we proposed to use neutralizing antibodies as nasal  
145 spray to prevent viral infection at the viral entry point to human body.

146



147 A8G6 was a combination of 58G6 and 55A8 monoclonal NAbS which were  
148 identified from COVID-19 convalescent patients at early 2020.<sup>11</sup> Previous  
149 study showed that 58G6 recognized both the steric site S<sup>470-495</sup> and another  
150 region S<sup>450-458</sup> on the receptor binding domain (RBD) of SARS-CoV-2 spike  
151 protein (S protein). When administrated as a nasal spray, 58G6 demonstrated  
152 prophylactic efficacy against authentic SARS-CoV-2 ancestral strain and the  
153 Beta variant (B.1.351) in the transgenic mice expressing human ACE2 (hACE2)  
154 and against Delta and Omicron variants in hamster model.<sup>12,13</sup> 55A8 exhibited  
155 potent binding affinities to the S proteins of ancestral SARS-CoV-2 strain,  
156 Delta, Omicron BA.1, BA.2, and BA.4/5 at sub-picomolar level. When the two  
157 NAbS simultaneously interacted with S protein, 58G6 and 55A8 recognized  
158 different and complementary epitopes in RBD of SARS-CoV-2 and further  
159 occluded the accessibility of the S protein to ACE2. Therefore, A8G6 antibody  
160 cocktail which consisted of two potent neutralizers 58G6 and 55A8 displayed a  
161 synergetic potency and the broad neutralization against the Omicron  
162 variants.<sup>14</sup> Moreover, intranasal delivery of the cocktail A8G6 demonstrated  
163 potent protection against Omicron in hamster model. A first-in-human trial of  
164 the intranasal spray A8G6 antibody cocktail in healthy volunteers provided  
165 evidences for safety and the potential clinical efficacy in preventing Omicron  
166 BA.4/5 infections (unpublished, manuscript in preparation). The real-world  
167 effectiveness of the A8G6 nasal spray needs to be further evaluated.

168

169 Here we conducted an open-label, non-randomized, two-arm, blank-controlled  
170 trial among close contacts of COVID-19 patients in several designated  
171 quarantine hotels to assessed the effectiveness and safety of A8G6 intranasal  
172 spray for the post-exposure prophylaxis of COVID-19 during the Omicron  
173 BA.5.2 wave occurred in November, 2022 in Chongqing, China.

174

## 175 **2. Methods**

### 176 **Study design**

177 In this study, an open-label, non-randomized, two-arm, blank-controlled,  
178 investigator-initiated trial was designed to assess the efficacy and safety of the  
179 intranasal spray cocktail A8G6 in preventing SARS-CoV-2 infection among  
180 close contacts with COVID-19 patients. The clinical trial was conducted at 6  
181 designated quarantine hotels in Yuzhong District, Chongqing, China from  
182 November 27, 2022 and was completed on December 12, 2023.

183

184 Recruited participants in the treatment group self-administrated a three doses  
185 of 0.7 mg (140µl) A8G6 nasal spray per day for 7 treatment days. The drug  
186 was supplied by Chongqing Mingdao Haoyue Biotechnology Co., LTD  
187 (Chongqing, China), stored at 2-8 °C. In the blank control group, participants  
188 did not receive any treatment. After enrollment, SARS-CoV-2 infection was  
189 confirmed by a reverse transcription polymerase chain reaction (RT-PCR) test  
190 of oropharyngeal swab. During this trial, with the adaption of the

191 anti-COVID-19 policy, not only RT-PCR, but also rapid antigen tests were used  
192 to confirm the SARS-CoV-2 infection status.

193

194 The trial was carried out in accordance with all applicable national and local  
195 regulatory requirements. Data and Safety Monitoring Board of The Second  
196 Affiliated Hospital of Chongqing Medical University oversaw trial conduct and  
197 documentation. The protocol has been approved by the Chinese clinical test  
198 registration center (the world health organization international clinical trials  
199 registered organization registered platform (ICTRP), the registration number:  
200 ChiCTR2200066416) and the Ethics Committees of The Second Affiliated  
201 Hospital of Chongqing Medical University (the approval number: 2022127-1).

202

### 203 **Participants**

204 During November COVID-19 wave in Chongqing, China, when patients had  
205 been diagnosed as COVID-19 with the positive RT-PCR test for SARS-CoV-2  
206 (index cases), their close contacts were immediately transferred to the  
207 designated quarantine sites. At 6 quarantine sites in Chongqing, healthy adults  
208 aged between 18 to 65 years who had a close contact with index cases within  
209 72 hours were enrolled into this study. The maximum time interval between  
210 exposure to treatment was  $\leq 72$  hours. All vaccination status is eligible for  
211 inclusion. Exclusion criteria included positive RT-PCR at baseline, nasal  
212 discomfort, the use of other COVID-19 antibody drugs and drug-drug

213 interference with participants' regular medication (additional details about  
214 eligibility criteria were described in the appendix).

215

216 All study participants were capable of self-administrating the intranasal spray,  
217 recording and recalling clinical signs. All participants were provided and  
218 voluntarily signed written informed consent before the study.

219

## 220 **Procedures**

221 At six quarantine sites in the Yuzhong District, Chongqing, site investigation  
222 was carried out to screen eligible participants. Eligible participants were given  
223 the choice to join the A8G6 treatment group or blank control group. For eligible  
224 participants that showed "no preference" in either group, they were randomly  
225 assigned to A8G6 treatment group or blank control group. Oropharyngeal  
226 swabs were taken for quantitative and qualitative RT-PCR assessments at  
227 baseline prior to treatment and though the treatment period and a follow-up  
228 period. Subjects with positive RT-PCR results before treatment were excluded.  
229 The SARS-CoV-2 viral load was present by viral genome copies per mL log<sub>10</sub>  
230 values with the conversion of the open reading frame of 1ab (ORF1ab) and  
231 nucleocapsid (N-gene) cycle threshold (Ct) values (RT-PCR was conducted by  
232 Yuzhong District Center for Disease Control and Prevention, in Chongqing,  
233 China. Conversion of Ct values to viral genome copies was calculated  
234 according to the manufacturer's instructions of 2019-nCoV viral RNA kit

235 produced by BioPerfectus Technologies, catalog number: JC10223-1N).

236

237 Subjects' demographic data, health and COVID-19 vaccination status were  
238 recorded at the baseline visit (Day 0). The use of nasal spray, rapid antigen  
239 tests or RT-PCR test for COVID-19 were recorded every day during the study  
240 participation. When participants in both groups were diagnosed with  
241 SARS-CoV-2 infection, the related symptoms and symptomatic treatment for  
242 COVID-19 were reported until the trial completed. In the treatment group, all  
243 participants were requested to self-report and record the adverse events. Due  
244 to the relaxation of COVID-19 control and policy starting from December 4,  
245 2022, some participants returned to home for further isolation. The follow-up  
246 visits were adjusted to retrospective telephonic visit according to a  
247 questionnaire form from that day.

248

## 249 **Outcomes**

250 The primary endpoint analysis included all participants in both the treatment  
251 and control groups. The primary endpoint was to assess the efficacy of the  
252 intranasal spray A8G6 for post-exposure prophylaxis of COVID-19. In this  
253 study, we compared the COVID-19 incidence of the close contacts between  
254 the A8G6 treatment individuals and the blank-controlled individuals. We also  
255 compared the time from enrollment to SARS-CoV-2 infection between the two  
256 groups. The secondary efficacy analysis included the quantitative data of

257 SARS-CoV-2 RNA (log10 copies per mL) at baseline of the positive COVID-19,  
258 the time to conversion of SARS-CoV-2 RNA from positive to negative (viral  
259 clearance) and the time to symptom remission of COVID-19 patients.

260

261 Safety endpoints was adverse event types and the incidence rate of adverse  
262 events among all participants of the A8G6 treatment group during the study.

263 An adverse effect was defined as any abnormal signs or symptoms and  
264 harmful results caused by the study drug.

265

### 266 **Statistical analysis**

267 The sample size in this clinical trial was determined on the basis of statistical  
268 power calculations. We proposed greater than 90% power to detect a 20%  
269 relative difference between the A8G6 treated and control group at a two-sided  
270 alpha level of 0.05 (ie., a 20% prevention efficacy of A8G6). The formula is as  
271 follows:

$$n = \frac{2pq(Z_{1-\frac{\alpha}{2}} + Z_{1-\beta})^2}{\delta^2}$$

272 which p is the proportion of participants develop COVID-19 in A8G6 treated  
273 group, q is in the control group,  $\delta$  is the difference between two group,  $\alpha$  is  
274 two-sided alpha level, and  $1-\beta$  is statistical power. In this clinical trial, we  
275 assume that q is 0.1, 20% relative reduction of A8G6 treated group is 0.08.

276 Assuming a dropout rate of 20%, at total of 5160 participants will be recruited.

277

278 The primary efficacy endpoints including COVID-19 incidence and time to  
279 confirmed SARS-CoV-2 infection. The COVID-19 incidence was analyzed  
280 using the Kaplan-Meier method and log-rank test, and the time to confirmed  
281 SARS-CoV-2 infection was analyzed using Wilcoxon rank-sum test. The  
282 secondary efficacy endpoints including viral load when confirmed  
283 SARS-CoV-2 infection and the time to negative conversion of SARS-CoV-2  
284 determined by RT-PCR. The viral load when confirmed SARS-CoV-2 infection  
285 was analyzed using Wilcoxon rank-sum test, negative conversion of  
286 SARS-CoV-2 and remission time were conducted using Kaplan-Meier method  
287 and log-rank-test. Safety was assessed in participants in the full analysis set  
288 who received A8G6 nasal spray treatment during the 8-day quarantine period.

289

290 Database from the Service Platform for COVID-19 Prevention and Control  
291 created by Yuzhong District Center for Disease Control and Prevention were  
292 authorized for us to use and analyze. Data including demographic and clinical  
293 characteristics of the cohorts, endpoints in this clinical trial were collected from  
294 an applet of WeChat (a social media platform in China), called “Yuzhong  
295 Information Exchange”. All data were summarized with descriptive statistics  
296 (number of subjects (%), median (IQR), mean±sd). The credible interval for  
297 nasal spray was calculated with the use of a beta-binomial model with prior  
298 beta (1, 1) adjusted for the treatment duration time. Continuous variables were

299 compared with the Mann–Whitney U-test, and Categorical variables were  
300 conducted using  $\chi^2$  test or Fisher's exact test. A P value of <0.05 was  
301 considered statistically significant. Statistical analyses were performed using R  
302 software, version 3.6.0.

303

### 304 **Role of the funding source**

305 The funder of the study had no role in study design, data collection, data  
306 analysis, data interpretation, or writing of the report. All authors  
307 had full access to all the data in the study and had final responsibility for the  
308 decision to submit for publication.

309

### 310 **3. Results**

311 Since November 27, 2022, a total of 657 individuals were screened in the  
312 designated quarantine hotels. There were 101 individuals excluded according  
313 to the inclusion and exclusion criteria. The remaining 556 individuals were  
314 assigned into either A8G6 treatment group or blank-controlled group based on  
315 their preference during signing of consent form. For participants who indicated  
316 “no preference” in study group assignment, they were randomly assigned to  
317 A8G6 treatment group or the blank control group. Ten participants in the  
318 treatment group and 33 participants in the control group were excluded due to  
319 consent withdrawal or loss to follow up (Figure 1). The full analysis set (n=513)  
320 included all participants who received the A8G6 treatment or blank-control and



321 completed the study. The per-protocol population (n=162) in the treatment  
322 group comprised participants who received the A8G6 treatment or no  
323 treatment, were treated within 72 hours after exposure.

324

325 The final number of subjects completing the trial was 173 subjects in the A8G6  
326 treatment group and 340 subjects in the control group, respectively. In the  
327 treatment group, 4 participants started to self-administrated A8G6 at the same  
328 day after exposure (Day 0); 73 participants used the nasal spray at the first day  
329 after exposure (Day 1); 49 participants at the second days after exposure (Day  
330 3); 35 participants at the third day after exposure (Day 3) and 12 participants at  
331 more than 4 days after exposure (Day $\geq$ 4). Among all participants in the full  
332 analysis set, median age was 36.0 (interquartile range, IQR: 26.0-48.0) years;  
333 there was a comparable sex ratio between the A8G6 group (55.5% for male  
334 and 44.5% for female) and the control group (58.2% for male and 41.8% for  
335 female); median BMI was 22.9 (IQR: 20.8-25.4); 18 (10.4%) participants in the  
336 treatment group have comorbidities, while 44 (12.9%) participants in the  
337 control group have comorbidities. 98.6% participants received different doses  
338 of COVID-19 vaccines (Table 1).

339

### 340 **Efficacy of A8G6 nasal spray in the post-exposure prevention of** 341 **SARS-CoV-2 infection**

342 After enrollment, oropharyngeal swabs of all subjects in the full analysis set

343 were taken for RT-PCR test for SARS-CoV-2 infection every day. In total,  
344 163/513 (31.8%) participants developed COVID-19 during the 14-day  
345 follow-up study. Among them, 12/173 (6.9%) individuals were in the A8G6  
346 treatment group and 151/340 (44.4%) were in the blank control group (Table  
347 1-3, Figure 2A). This difference in COVID-19 incidence rate between groups  
348 was statistically significant (Hazard ratio, HR=0.12, 95% CI, 0.07-0.22;  
349 log-rank  $p<0.001$ ). The mean ( $\pm$ SD) time of the positive COVID-19 conversion  
350 was significantly longer in the A8G6 group compared to the control group  
351 ( $3.4\pm 1.1$  days vs  $2.6\pm 1.2$  days,  $p=0.019$ ) (Figure 2B). Similar results of data  
352 analysis were obtained in the per protocol set (data not shown).

353

#### 354 **The effect of A8G6 on the viral load of SARS-CoV-2 infection at baseline**

355 After enrollment, oropharyngeal swabs of all subjects were taken for RT-PCR  
356 test for SARS-CoV-2 every day. When participants were diagnosed as  
357 SARS-CoV-2 infection, the Ct values of ORF1ab and N genes were recorded  
358 and converted into copies per mL log<sub>10</sub> values. Five subjects (41.7%) in the  
359 A8G6 treatment group had high viral load ( $>10^5$  copies/ml) of the ORF1ab  
360 gene, compared with 69 subjects (45.7%) in the control group (Table 3); Five  
361 subjects (41.7%) in the A8G6 treatment group had high viral load of the N gene  
362 ( $>10^5$  copies/ml), compared with 100 subjects (66.2%) in the control group.  
363 There were no significant differences on the percentage of participants with  
364 high viral load of these two genes ( $p=1.000$  and  $0.117$ , respectively) between

365 the two groups. That is, despite participants received the A8G6 treatment,  
366 when they became infected with SARS-CoV-2, they had a comparable level of  
367 viral load compared to infected participants in the blank control group (Figure  
368 3). The same analysis conducted in the per protocol set obtained the  
369 consistent results.

370

### 371 **The effect of A8G6 on the time to the COVID-19 recovery**

372 When participants became infected with SARS-CoV-2 in both groups, RT-PCR  
373 tests or rapid antigen tests of their oropharyngeal swabs for COVID-19 and the  
374 COVID-19 related symptoms were continuously monitored and recorded.  
375 Subjects in both groups who were infected with SARS-CoV-2 during the trial  
376 period reported the conversion to COVID-19 negative by the end of the trial.  
377 The time of SARS-CoV-2 negativity between groups showed no statistical  
378 differences ( $p=0.946$ ) (Figure 4). There is a similar result in the per protocol  
379 set.

380

### 381 **Safety**

382 Participants receiving A8G6 treatment (n=173) were required to recorded  
383 adverse events (AEs). Thereinto, AEs reported by COVID-19 negative  
384 participants (n=161) were not correlated with COVID-19, but might be  
385 correlated with the A8G6 treatment. AEs reported by COVID-19 positive  
386 participants (n=12) might be correlated with COVID-19 or A8G6. Therefore,

387 after the exclusion of AEs related to COVID-19, the presumptive AEs related to  
388 A8G6 treatment were analyzed. Total of 96.9% of the participants in the A8G6  
389 treatment group had no treatment-related adverse effects. Only 3.1% subjects  
390 reported one adverse event. The special performance included nasal swelling  
391 (N=2, 1.24%), dry throat (N=2, 1.24%) and ageusia (N=1, 0.62%) (Table 4). No  
392 adverse events of special interest were reported during the trial period, and no  
393 participants withdrew from the trial because of an adverse event. There is a  
394 similar result in the per protocol set.

395

396

397

398

399 **4. Discussion**

400 The nasal spray antibody cocktail A8G6 had demonstrated broad spectrum  
401 potency blocking the SARS-CoV-2 infection in our previous preclinical data  
402 and also demonstrated favorable safety profile in a first-in-human trial  
403 (unpublished data, manuscript in preparation). In this study, we conducted an  
404 open-label, non-randomized, two-arm, blank-controlled trial among close  
405 contacts of COVID-19 patients in several designated quarantine hotels, during  
406 the COVID-19 outbreak occurred in November, 2022 in Chongqing, China.  
407 The intranasal spray antibody cocktail A8G6 was assessed to the  
408 effectiveness and safety for the post-exposure prophylaxis of COVID-19 in the  
409 real-world. Our data suggest that the application of A8G6 in the close contacts  
410 within the 72-hour exposure decreased COVID-19 incidence rate by more than  
411 30%. Moreover, the A8G6 treatment prolonged the occurrence of SARS-CoV-2  
412 infection by at least one day.

413

414 At present, most previously authorized COVID-19 antibody treatments under  
415 EUA were administrated via vein or intramuscular injection with a high dosage.  
416 Those treatment also had several adverse effected that affect quality of life,  
417 including pain at the site of injection, allergic reaction, nausea and so on.<sup>15</sup> As  
418 a respiratory pathogen, SARS-CoV-2 infection is primarily caused by breathing  
419 in infectious viral particles through nasal airway. An intranasal spray of  
420 neutralizing antibodies may provide a more direct protection against viral entry.

421 Moreover, this non-invasive drug delivery is easier to use and may result in  
422 better medication compliance. In our study, the favorable safety profile of  
423 A8G6 with the few adverse effects was consistent with other nasal spray  
424 drugs.<sup>16</sup> Thus, A8G6 can be used in a wide range of population, especially in  
425 some special population with comorbidities and immunocompromised  
426 population. The effective treatment of A8G6 among high-risk patients could  
427 reduce medical cost, usage of medical resources and COVID-19 transmission  
428 risk. Furthermore, participants who experienced SARS-CoV-2 infection under  
429 the A8G6 treatment, showed delayed COVID-19 infection by ~ 1 day, which  
430 could provide important relieve on medical resources at the epidemic peak.

431

432 Currently, there were a few other antibody nasal sprays in clinical development.  
433 The neutralization efficacy of nasal mucosal samples against SARS-CoV-2  
434 variants after the nasal spray treatment of a monoclonal antibody 35B5 was  
435 calculated as 60%.<sup>17</sup> The effectiveness of the SA58 nasal spray was evaluated  
436 as 77.7% (95% CI: 52.2% - 89.6%) and 61.83% (95% CI: 37.5% - 76.69%) in  
437 medical personnel and healthy workers, respectively.<sup>18,19</sup> In our primary  
438 endpoint analysis, the nasal spray A8G6 antibody cocktail showed decreased  
439 risk of infection of close contacts with COVID-19 patients. The prevention  
440 efficacy of the A8G6 treatment within 72-hour exposure was calculated to be  
441 84.4% (95% CI: 74.4-90.4). A8G6 showed comparable or better COVID-19  
442 prevention in the real world than other similar antibody nasal spray.

443

444 Current data in this study showed that 6.9% of A8G6 treated participant  
445 became SARS-CoV-2 positive (vs 44.4% in the blank control group) during the  
446 study period. Our results suggested that post-infection A8G6 treatment  
447 provided limited benefits on viral load reduction and time to viral clearance.  
448 This is consistent with the potential mechanism of action of A8G6 nasal spray.  
449 Once SARS-CoV-2 virus enters into the cells and starts viral replication, A8G6  
450 neutralizing antibody has limited efficacy to stop the viral replication. Our data  
451 also indicated that baseline characteristics of these two groups in the efficiency  
452 of viral replication were similar.<sup>20</sup> In another study, the similar viral load were  
453 also reported between the vaccinated individuals with breakthrough infections  
454 and unvaccinated individuals with SARS-CoV-2 infection.<sup>21</sup>

455

456 There were several limitations for this study. First limitation is the lack of a  
457 placebo arm. We did not conduct this study with the double-blind procedure  
458 because there was a small window of time to initiate and complete the study so  
459 not allowing enough time for the placebo to be produced before the trial.  
460 Second limitation is the lack of participant randomization in the study design.  
461 This was primarily due to a large percentage of eligible participants not feel  
462 comfortable to take the A8G6 treatment at time of enrollment. Therefore, we  
463 have to assign those participants to blank-controlled group. Under this  
464 situation, complete randomization was not possible. Third limitation is the lack

465 of participants developing severe COVID-19 that need hospitalization due to  
466 small sample size. Therefore, this study did not assess the efficacy of A8G6 in  
467 preventing severe COVID-19. During the study period, there was an  
468 adjustment of the public health policy of the COVID-19 pandemic in China, that  
469 the SARS-CoV-2 infected persons no longer were reported in the future. As a  
470 result, the definition of close contacts became difficult and it became difficult to  
471 enroll more participants to increase the sample size. Fourth limitation is that  
472 the study was conducted in the designated quarantine hotels. Study  
473 participants were assumed to be single-exposure to positive COVID-19  
474 individuals. The effects of increased infection risks of multiple exposures in the  
475 real world on the A8G6 efficacy should be considered in the further study.

476

477 In conclusion, we observed potent post-exposure prevention efficacy of  
478 intranasal spray AG86 antibody combination in close contacts of COVID-19  
479 patients. This proof-of-concept study result suggested the potential beneficial  
480 effect of neutralizing antibody administrated as nasal spray in COVID-19  
481 prevention. Currently A8G6 nasal spray is under clinical development to further  
482 assess its efficacy and safety.

483



484 **Contributors**

485 AH, NT and XL designed the trial and study protocol. PP contributed to the  
486 literature search. XL and HD verified the data. PP and HD wrote the first draft  
487 manuscript. AH, NT, XL, PP, HD and ZY contributed to the data interpretation  
488 and revision of the manuscript. HD, XL, NT and PP contributed to data  
489 analysis. XL monitored the trial. QY, SC, BL, MH and XL were responsible for  
490 the site work including the recruitment, follow-up, and data collection, and XL  
491 was the site coordinator. All the authors had full access to all the data in the  
492 study and had final responsibility for the decision to submit for publication.

493

494 **Declaration of interests**

495 All authors declare no competing interests.

496

497 **Data sharing**

498 De-identified individual participant-level data will be available upon written  
499 request to the corresponding author following publication.

500

501 **Acknowledgements**

502 We thank Dr. Yang Tian and Chengyong Yang (Mindao Haoyue Co., Ltd.  
503 , Chongqing, China) for the constructive suggestion about the trial design and  
504 manuscript. We thank all the participants who took part and contribute  
505 specimens in our study. We also thank the support from Yuzhong District  
506 Center for Disease Control and Prevention (Chongqing) and all medical

507 personnels who worked hard in this trial.

508

509 **Figures and Tables**

510 **Table 1. Demographic and Clinical Characteristics of the Cohort.**

| Characteristic                    | A8G6 (N=173)     | Control (N=340)  | Total (N=513)    |
|-----------------------------------|------------------|------------------|------------------|
| <b>Age</b>                        |                  |                  |                  |
| Median age (IQR, year)            | 29.0 (24.0-40.0) | 41.0 (30.0-50.0) | 36.0 (26.0-48.0) |
| Mean±sd                           | 32.6±10.4        | 40.1±12.2        | 37.6±12.2        |
| <b>Sex</b>                        |                  |                  |                  |
| Male                              | 96 (55.5%)       | 198 (58.2%)      | 294 (57.3%)      |
| Female                            | 77 (44.5%)       | 142 (41.8%)      | 219 (42.7%)      |
| <b>Weight (mean±sd)</b>           |                  |                  |                  |
|                                   | 60.0 (53.0-70.0) | 63.0 (55.0-70.0) | 63.0 (55.0-70.0) |
| <b>BMI (mean±sd)</b>              |                  |                  |                  |
|                                   | 22.2 (19.6-24.5) | 23.1 (21.3-25.6) | 22.9 (20.8-25.4) |
| <b>Comorbidities</b>              |                  |                  |                  |
| Metabolic disease                 | 6 (3.5%)         | 28 (8.2%)        | 34 (6.6%)        |
| Respiratory disease               | 3 (1.7%)         | 7 (2.1%)         | 10 (1.9%)        |
| Cardiovascular diseases           | 1 (0.6%)         | 1 (0.3%)         | 2 (0.4%)         |
| Other                             | 8 (4.6%)         | 8 (2.4%)         | 16 (3.1%)        |
| All                               | 18 (10.4%)       | 44 (12.9%)       | 62 (12.1%)       |
| <b>Vaccine type</b>               |                  |                  |                  |
| Inactivated vaccine               | 156 (90.2%)      | 317 (93.2%)      | 473 (92.2%)      |
| Recombinant vaccine               | 12 (6.9%)        | 17 (5.0%)        | 29 (5.7%)        |
| Inactivated + Recombinant vaccine | 3 (1.7%)         | 1 (0.3%)         | 4 (0.8%)         |
| Unvaccinated                      | 2 (1.2%)         | 5 (1.5%)         | 7 (1.4%)         |

**Dose**

|         |             |             |             |
|---------|-------------|-------------|-------------|
| 0-dose  | 2 (1.2%)    | 5 (1.5%)    | 7 (1.4%)    |
| 1-dose  | 0 (0.0%)    | 5 (1.5%)    | 5 (1.0%)    |
| 2-dose  | 30 (17.3%)  | 42 (12.4%)  | 72 (14.0%)  |
| 3-dose  | 140 (80.9%) | 286 (84.1%) | 426 (83.0%) |
| 4-dose  | 1 (0.6%)    | 1 (0.3%)    | 2 (0.4%)    |
| Missing | 0 (0.0%)    | 1 (0.3%)    | 1 (0.2%)    |

**COVID-19 outcome**

|                 |             |             |             |
|-----------------|-------------|-------------|-------------|
| Positive (n, %) | 12 (6.9%)   | 151 (44.4%) | 163 (31.8%) |
| Negative (n, %) | 161 (93.1%) | 189 (55.6%) | 350 (68.2%) |

---

511

512

513

514

515

516

517 **Table 2. Demographic and Clinical Characteristics of COVID-19 positive**  
 518 **individuals**  
 519

| Characteristic                                                      | A8G6 (N=12)      | Control (N=151)  | P value |
|---------------------------------------------------------------------|------------------|------------------|---------|
| <b>Age</b>                                                          |                  |                  | 0.103   |
| Median age (IQR, year)                                              | 36.0 (31.2-45.5) | 42.0 (32.0-51.0) |         |
| Mean±sd                                                             | 36.3±10.4        | 41.8±12.0        |         |
| <b>Sex</b>                                                          |                  |                  | 0.375   |
| Male                                                                | 8 (66.7%)        | 77 (51.0%)       |         |
| Female                                                              | 4 (33.3%)        | 74 (49.0%)       |         |
| <b>Weight (mean±sd)</b>                                             | 61.5 (58.8-66.2) | 63.0 (55.0-70.0) | 0.934   |
| <b>BMI (mean±sd)</b>                                                | 21.4 (20.9-23.2) | 23.7 (21.4-26.0) | 0.057   |
| <b>Clinical phenotype</b>                                           |                  |                  | 0.694   |
| Symptomatic                                                         | 11 (91.7%)       | 127 (84.1%)      |         |
| Asymptomatic                                                        | 1 (8.3%)         | 24 (15.9%)       |         |
| <b>Days to COVID-19 confirmed</b>                                   |                  |                  | 0.019   |
| median days, IQR                                                    | 3.5 (2.8-4.0)    | 3.0 (2.0-3.0)    |         |
| Mean±sd                                                             | 3.4±1.1          | 2.6±1.2          |         |
| <b>Duration of SARS-CoV-2 positive (day)</b>                        |                  |                  | 0.724   |
| median days, IQR                                                    | 6.5 (5.0-7.2)    | 7.0 (4.0-7.0)    |         |
| Mean±sd                                                             | 6.7±1.9          | 6.3±2.5          |         |
| <b>Viral load (Conversion according to Ct value of ORF1ab gene)</b> |                  |                  | 1.000   |

|                                                                |               |               |       |
|----------------------------------------------------------------|---------------|---------------|-------|
| High level, >10 <sup>5</sup> copies/ml                         | 5 (41.7%)     | 69 (45.7%)    |       |
| Low level, <10 <sup>5</sup> copies/ml                          | 7 (58.3%)     | 82 (54.3%)    |       |
| <b>Viral load (Conversion according to Ct value of N gene)</b> |               |               | 0.117 |
| High level, >10 <sup>5</sup> copies/ml                         | 5 (41.7%)     | 100 (66.2%)   |       |
| Low level, <10 <sup>5</sup> copies/ml                          | 7 (58.3%)     | 51 (33.8%)    |       |
| <b>Symptomatic treatment</b>                                   |               |               | 0.039 |
| Western medicine                                               | 11 (91.7%)    | 89 (58.9%)    |       |
| Traditional chinese medicine                                   | 0 (0.0%)      | 8 (5.3%)      |       |
| Combination of western and traditional chinese medicine        | 1 (8.3%)      | 6 (4.0%)      |       |
| Untreated                                                      | 0 (0.0%)      | 48 (31.8%)    |       |
| <b>Duration of Covid-19 symptoms (d)</b>                       |               |               | 0.401 |
| median days, IQR                                               | 5.0 (1.5-5.0) | 3.0 (2.0-4.5) |       |
| Mean±sd                                                        | 4.3±2.9       | 4.2±5.0       |       |
| <b>Comorbidities</b>                                           |               |               | 0.435 |
| Metabolic disease                                              | 1 (8.3%)      | 17 (11.3%)    |       |
| Respiratory disease                                            | 1 (8.3%)      | 2 (1.3%)      |       |
| Cardiovascular diseases                                        | 0 (0.0%)      | 1 (0.7%)      |       |
| Other                                                          | 1 (8.3%)      | 5 (3.3%)      |       |
| All                                                            | 3 (25.0%)     | 25 (16.6%)    |       |
| <b>Vaccine type</b>                                            |               |               | 0.203 |
| Inactivated vaccine                                            | 10 (83.3%)    | 143 (94.7%)   |       |

|                           |            |             |       |
|---------------------------|------------|-------------|-------|
| Recombinant vaccine       | 2 (16.7%)  | 5 (3.3%)    |       |
| Unvaccinated              | 0 (0.0%)   | 3 (2.0%)    |       |
| <b>Dose</b>               |            |             | 1.000 |
| 0-dose                    | 0 (0.0%)   | 3 (2.0%)    |       |
| 1-dose                    | 0 (0.0%)   | 1 (0.7%)    |       |
| 2-dose                    | 2 (16.7%)  | 24 (15.9%)  |       |
| 3-dose                    | 10 (83.3%) | 123 (81.5%) |       |
| <b>Signs and symptoms</b> |            |             |       |
| Fever                     | 10 (83.3%) | 83 (55.0%)  | 0.071 |
| Fatigue                   | 4 (33.3%)  | 22 (14.6%)  | 0.102 |
| Dry cough                 | 6 (50.0%)  | 54 (35.8%)  | 0.361 |
| Headache                  | 3 (25.0%)  | 39 (25.8%)  | 1.000 |
| Dizziness                 | 0 (0.0%)   | 5 (3.3%)    | 1.000 |
| Ageusia                   | 2 (16.7%)  | 8 (5.3%)    | 0.161 |
| Pharyngalgia              | 1 (8.3%)   | 12 (7.9%)   | 1.000 |
| Myalgia                   | 2 (16.7%)  | 37 (24.5%)  | 0.733 |
| Chill                     | 1 (8.3%)   | 3 (2.0%)    | 0.266 |
| Rhinorrhea                | 0 (0.0%)   | 2 (1.3%)    | 1.000 |
| Nasal congestion          | 0 (0.0%)   | 2 (1.3%)    | 1.000 |
| Diarrhea                  | 0 (0.0%)   | 4 (2.6%)    | 1.000 |
| Anorexia                  | 1 (8.3%)   | 6 (4.0%)    | 0.421 |
| Vomiting                  | 1 (8.3%)   | 1 (0.7%)    | 0.142 |

|                |            |             |       |
|----------------|------------|-------------|-------|
| Arthralgia     | 2 (16.7%)  | 4 (2.6%)    | 0.063 |
| Nausea         | 0 (0.0%)   | 2 (1.3%)    | 1.000 |
| Abdominal pain | 0 (0.0%)   | 1 (0.7%)    | 1.000 |
| Dry throat     | 0 (0.0%)   | 2 (1.3%)    | 1.000 |
| Insomnia       | 0 (0.0%)   | 2 (1.3%)    | 1.000 |
| Somnolence     | 0 (0.0%)   | 2 (1.3%)    | 1.000 |
| Asthma         | 0 (0.0%)   | 1 (0.7%)    | 1.000 |
| Expectoration  | 1 (8.3%)   | 0 (0.0%)    | 0.074 |
| Eye swelling   | 1 (8.3%)   | 0 (0.0%)    | 0.074 |
| Any            | 11 (91.7%) | 127 (84.1%) | 0.694 |

---

520

521

522

523

524

525

526

527

528



529 **Table 3. Primary and Key Secondary Efficacy End Points.**

| End Points                                                                 | A8G6 (n=178)     | Control (n=340) |
|----------------------------------------------------------------------------|------------------|-----------------|
| <b>Primary end point</b>                                                   |                  |                 |
| SARS-CoV-2 confirmed by RT-qPCR                                            |                  |                 |
| No. of participants (%)                                                    | 12 (7.0%)        | 151 (44.4%)     |
| Hazard ratio (95% CI)                                                      | 0.12 (0.07-0.22) | -               |
| log rank P value                                                           | 3.95E-21         | -               |
| Days to SARS-CoV-2 confirmed                                               |                  |                 |
| Total No. of days                                                          | 41               | 392             |
| Mean days to SARS-CoV-2 confirmed (days)                                   | 3.4              | 2.6             |
| P value                                                                    | 0.019            | -               |
| <b>Key secondary end points</b>                                            |                  |                 |
| High viral load at SARS-CoV-2 confirmed, ORF1ab >10 <sup>5</sup> copies/ml |                  |                 |
| No. of participants (%)                                                    | 5 (41.7%)        | 69 (45.7%)      |
| P value                                                                    | 1.000            | -               |
| High viral load at SARS-CoV-2 confirmed, N >10 <sup>5</sup> copies/ml      |                  |                 |
| No. of participants (%)                                                    | 5 (41.7%)        | 100 (66.2%)     |
| P value                                                                    | 0.117            | -               |
| SARS-CoV-2 negative conversion                                             |                  |                 |
| No. of participants (%)                                                    | 12 (100.0%)      | 151 (100.0%)    |
| Hazard ratio (95% CI)                                                      | 0.98 (0.54-1.77) | -               |
| log rank P value                                                           | 0.946            | -               |

Duration of SARS-CoV-2 positive (day)

|                                           |       |     |
|-------------------------------------------|-------|-----|
| Total No. of days                         | 80    | 917 |
| Mean days of SARS-CoV-2 positive duration | 6.7   | 6.3 |
| P value                                   | 0.724 | -   |

---

530

531

532

533

534

535

536

537

538 **Table 4. Individuals (n) having an adverse event (n=161).**

539

540

541

542

543

| <b>Adverse events</b> | <b>n (%)</b> |
|-----------------------|--------------|
| Nasal swelling        | 2 (1.24%)    |
| Dry throat            | 2 (1.24%)    |
| Ageusia               | 1 (0.62%)    |

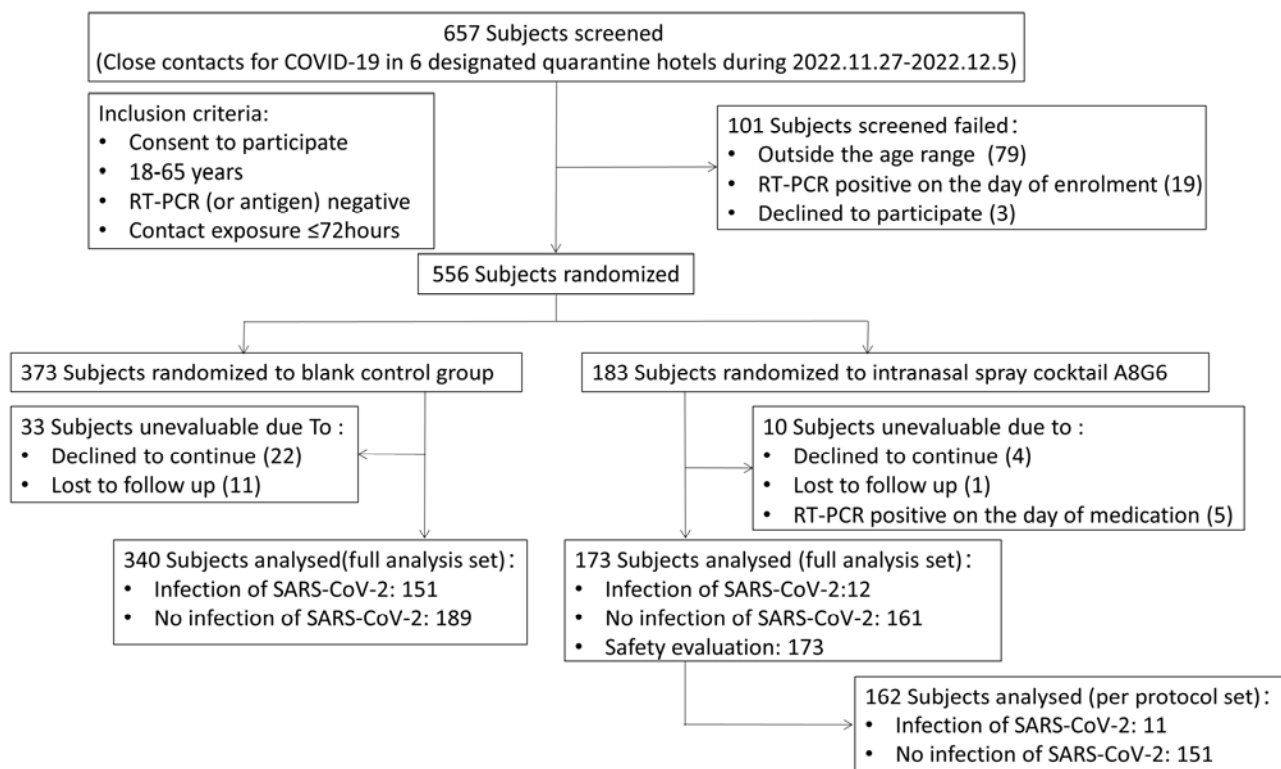

544 **Figure 1. Screening and follow-up of participants.**

545

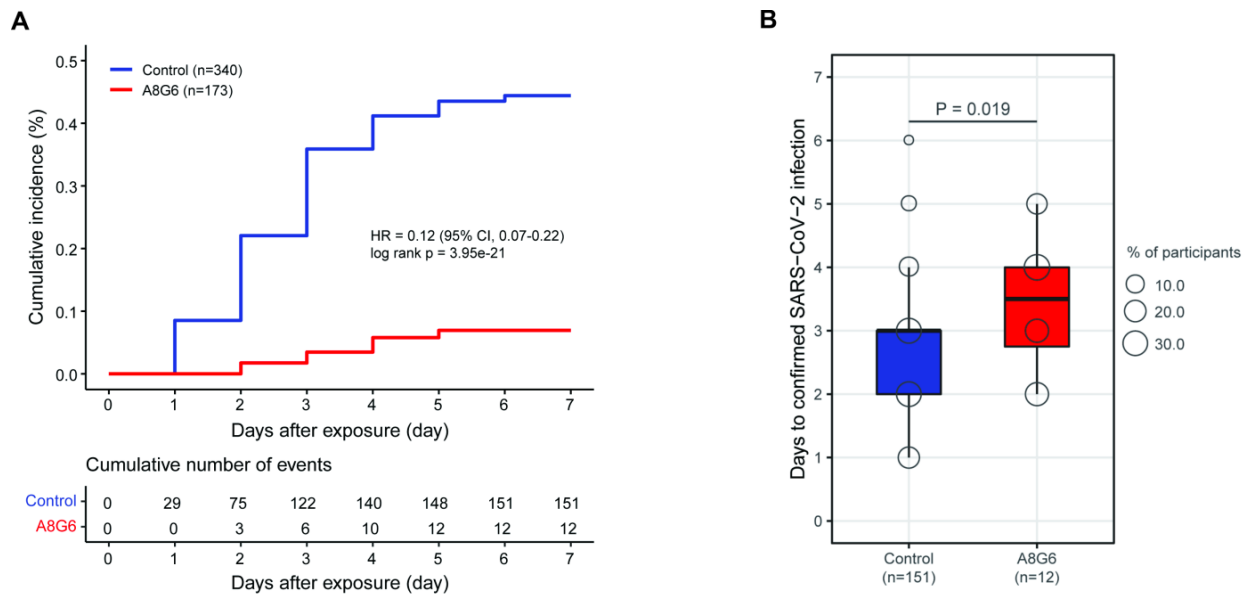

546

547 **Figure 2. Kaplan Meier plot of occurrence of RT-PCR-confirmed**  
 548 **COVID-19.**

549

550

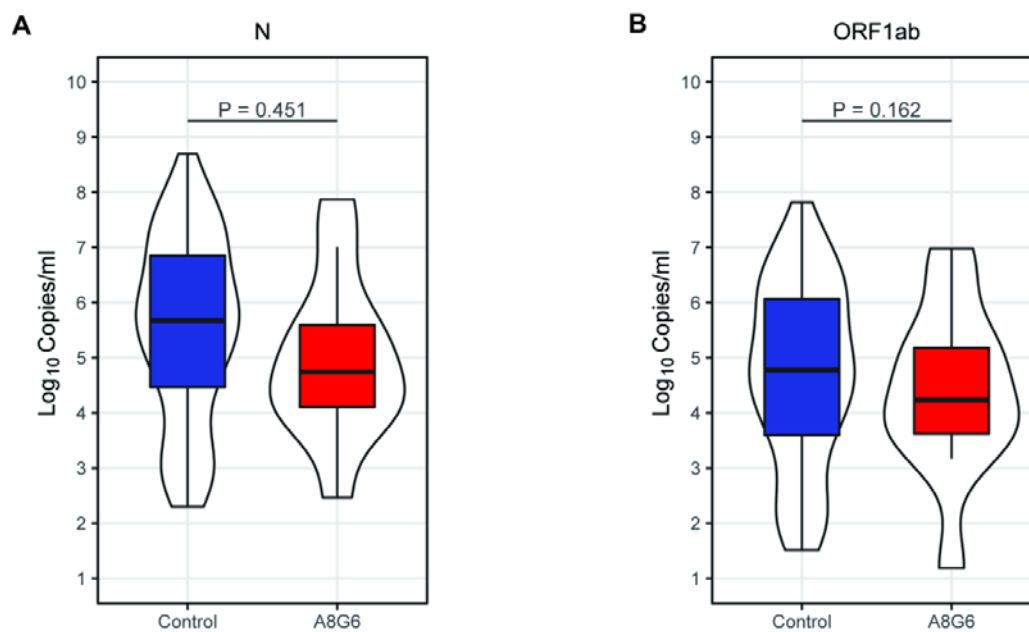

551 **Figure 3. SARS-CoV-2 viral load (log<sub>10</sub> copies per ml) at baseline when**  
552 **diagnosed with COVID-19.**

553

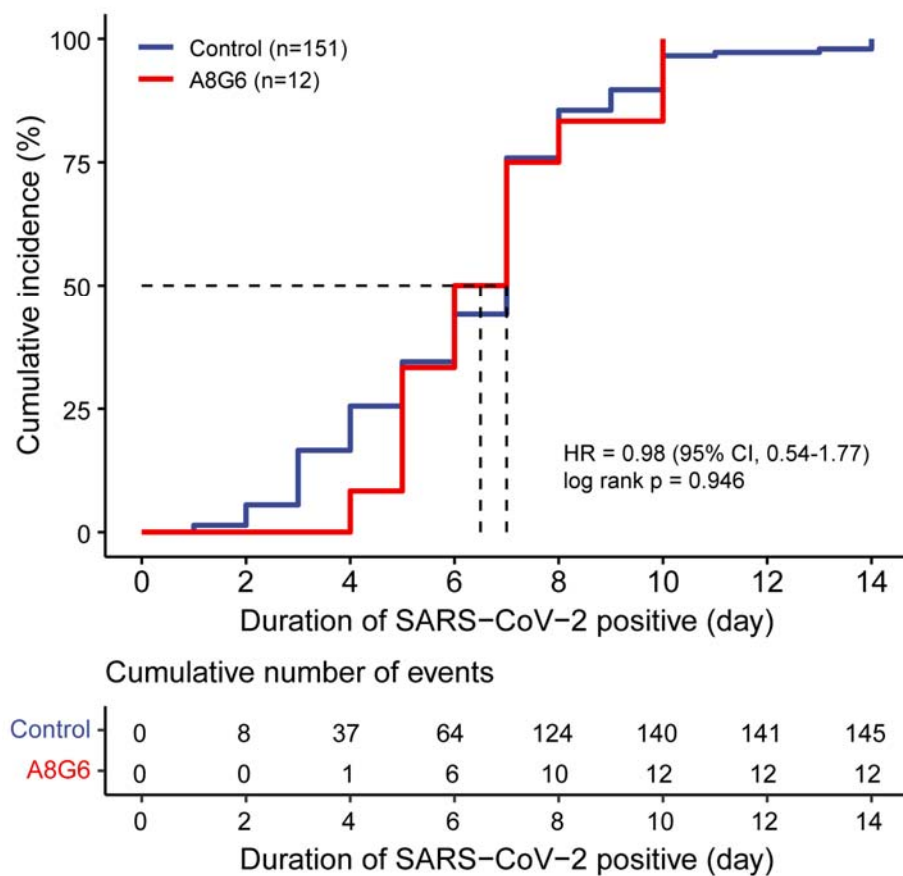

554

555 **Figure 4. Time-to-event curve for time to viral clearance of SARS-CoV-2.**

556

557 **References**

- 558 1. Sharif N, Alzahrani KJ, Ahmed SN, Dey SKJFii. Efficacy, immunogenicity and safety of  
559 COVID-19 vaccines: a systematic review and meta-analysis. 2021; 4149.
- 560 2. Tregoning JS, Flight KE, Higham SL, Wang Z, Pierce BFJNri. Progress of the COVID-19  
561 vaccine effort: viruses, vaccines and variants versus efficacy, effectiveness and escape. 2021;  
562 21(10): 626-36.
- 563 3. Andrews N, Stowe J, Kirsebom F, et al. Covid-19 vaccine effectiveness against the  
564 Omicron (B. 1.1. 529) variant. 2022; **386**(16): 1532-46.
- 565 4. Feikin DR, Higdon MM, Abu-Raddad LJ, et al. Duration of effectiveness of vaccines  
566 against SARS-CoV-2 infection and COVID-19 disease: results of a systematic review and  
567 meta-regression. 2022.
- 568 5. Thomas SJ, Moreira Jr ED, Kitchin N, et al. Safety and efficacy of the BNT162b2 mRNA  
569 Covid-19 vaccine through 6 months. 2021; **385**(19): 1761-73.
- 570 6. Abramowicz M, Zucotti G, Pflomm MJJ. Tixagevimab and cilgavimab (Evusheld) for  
571 pre-exposure prophylaxis of COVID-19. 2022; **327**(4): 384-5.
- 572 7. Gottlieb RL, Nirula A, Chen P, et al. Effect of bamlanivimab as monotherapy or in  
573 combination with etesevimab on viral load in patients with mild to moderate COVID-19: a  
574 randomized clinical trial. 2021; **325**(7): 632-44.
- 575 8. Gupta A, Gonzalez-Rojas Y, Juarez E, et al. Effect of sotrovimab on hospitalization or  
576 death among high-risk patients with mild to moderate COVID-19: a randomized clinical trial.  
577 2022; **327**(13): 1236-46.
- 578 9. Iketani S, Liu L, Guo Y, et al. Antibody evasion properties of SARS-CoV-2 Omicron



- 579 sublineages. 2022; **604**(7906): 553-6.
- 580 10. Orders MJMLDT. Casirivimab and imdevimab (REGEN-COV) for post-exposure  
581 prophylaxis of COVID-19. 2021; **63**(1631): 130-1.
- 582 11. Han X, Wang Y, Li S, et al. A rapid and efficient screening system for neutralizing  
583 antibodies and its application for SARS-CoV-2. 2021; **12**: 653189.
- 584 12. Li T, Han X, Gu C, et al. Potent SARS-CoV-2 neutralizing antibodies with protective  
585 efficacy against newly emerged mutational variants. 2021; **12**(1): 6304.
- 586 13. Zhang X, Zhang H, Li T, et al. A potent neutralizing antibody provides protection against  
587 SARS-CoV-2 Omicron and Delta variants via nasal delivery. 2022; **7**(1): 301.
- 588 14. Zhang X, Luo F, Zhang H, et al. A cocktail containing two synergetic antibodies broadly  
589 neutralizes SARS-CoV-2 and its variants including Omicron BA. 1 and BA. 2. 2022: 2022.04.  
590 26.489529.
- 591 15. Abdul A, Slenker AK. Monoclonal antibody therapy for high-risk coronavirus (COVID 19)  
592 patients with mild to moderate disease presentations.[Updated 2021 Apr 20]. 2021.
- 593 16. Tandon M, Wu W, Moore K, et al. SARS-CoV-2 accelerated clearance using a novel nitric  
594 oxide nasal spray (NONS) treatment: a randomized trial. 2022; **3**.
- 595 17. Lin Y, Yue S, Yang Y, et al. Nasal Spray of Neutralizing Monoclonal Antibody 35B5  
596 Confers Potential Prophylaxis Against Severe Acute Respiratory Syndrome Coronavirus 2  
597 Variants of Concern: A Small-Scale Clinical Trial. 2022.
- 598 18. Si S, Jin C, Li J, et al. Safety and Effectiveness of SA58 Nasal Spray against COVID-19  
599 Infection in Medical Personnel: An Open-label, Blank-controlled Study. 2022: 2022.12.  
600 27.22283698.

- 601 19. Song R, Zeng G, Yu J, et al. Post-Exposure Prophylaxis with SA58 (anti-COVID-19  
602 monoclonal antibody) Nasal Spray for the prevention of symptomatic Coronavirus Disease  
603 2019 in healthy adult workers: A randomized, single-blind, placebo-controlled clinical study.  
604 2023: 2022.12. 28.22283666.
- 605 20. V'kovski P, Kratzel A, Steiner S, Stalder H, Thiel VJNRM. Coronavirus biology and  
606 replication: implications for SARS-CoV-2. 2021; **19**(3): 155-70.
- 607 21. Singanayagam A, Hakki S, Dunning J, et al. Community transmission and viral load  
608 kinetics of the SARS-CoV-2 delta (B. 1.617. 2) variant in vaccinated and unvaccinated  
609 individuals in the UK: a prospective, longitudinal, cohort study. 2022; **22**(2): 183-95.  
610
